# Supplementary material
Source: PubMed Central journal article supplement (PMC7302928)
Supplement: NIHMS1594387-supplement-1.pdf [file NIHMS1594387-supplement-1.pdf]

**Supplementary Materials to  
Dissociation of TRIF bias and adjuvanticity**

Authors: Katharina Richard, Darren J. Perkins, Erin M. Harberts, Yang Song, Archana Gopalakrishnan, Kari Ann Shirey, Wendy Lai, Alexandra Vlk, Anup Mahurkar, Shreeram Nallar, Lynn D. Hawkins, Robert K. Ernst, Stefanie N. Vogel

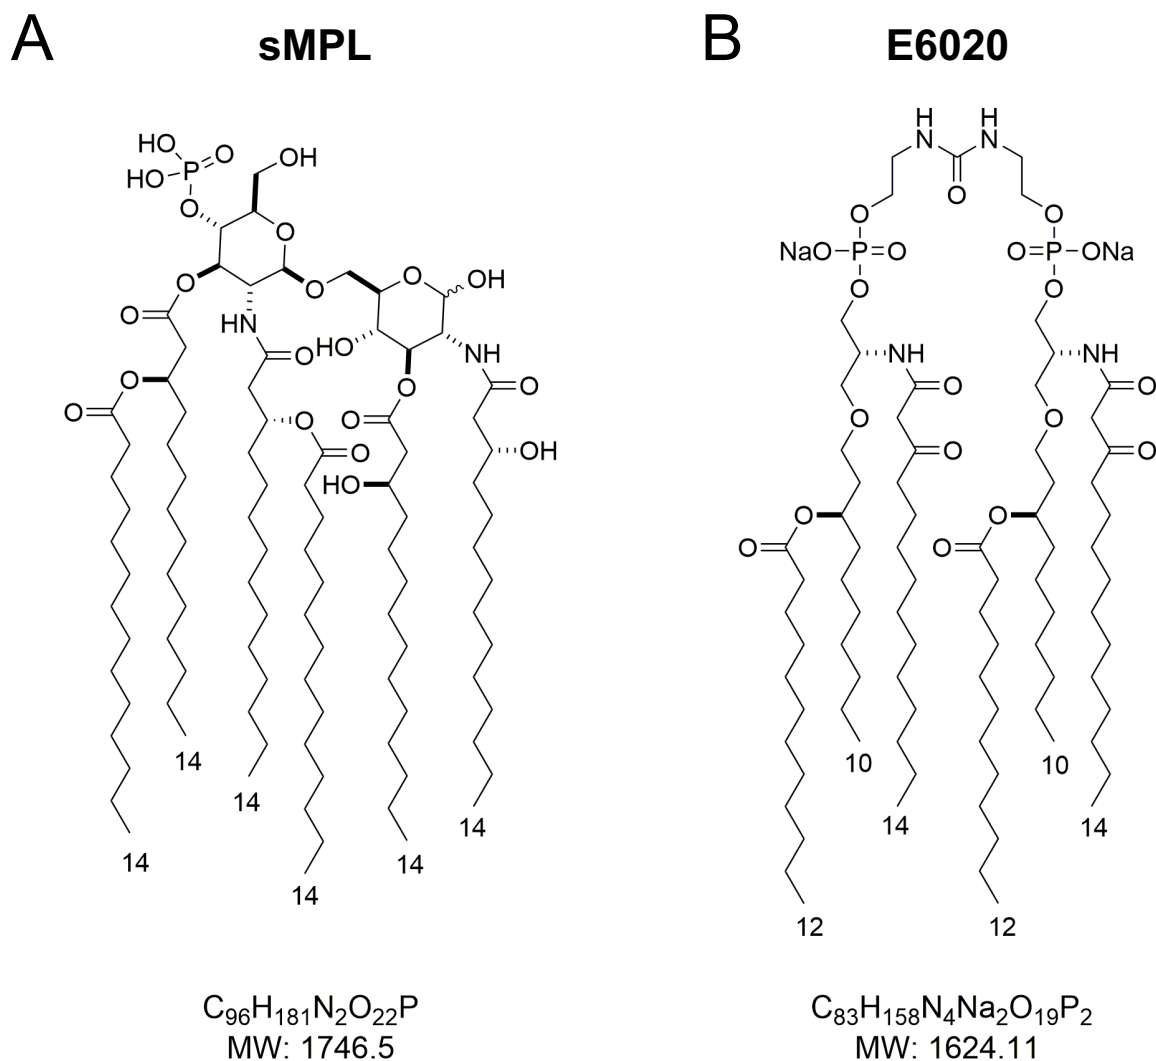

**Supplementary Figure 1. Comparison of chemical structures of sMPL (PHAD®) and E6020.**

## Murine macrophages RAW 264.7 macrophage cell line

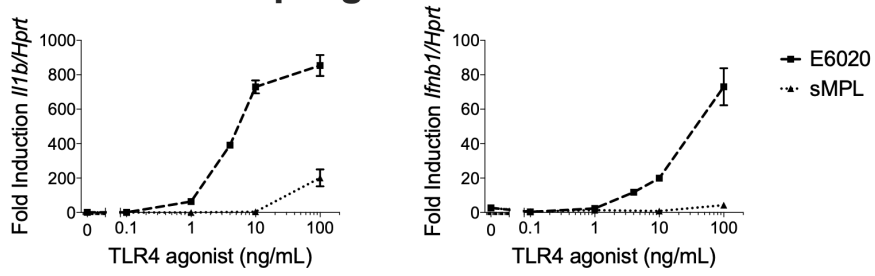

## MH-S alveolar macrophage cell line

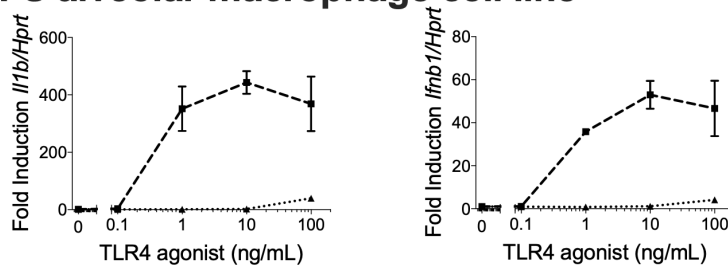

## BMDM

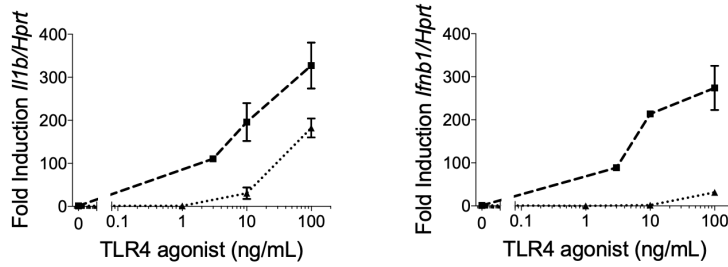

## Murine dendritic cells BMDC

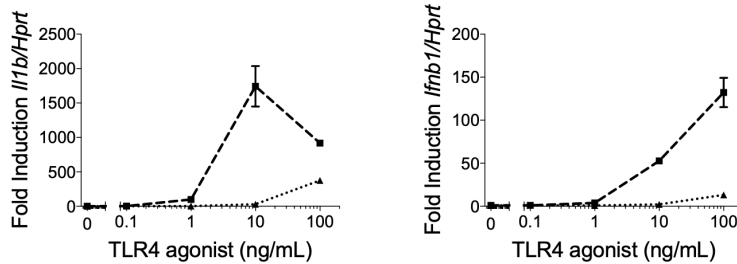

## Human macrophages THP-1 cell line

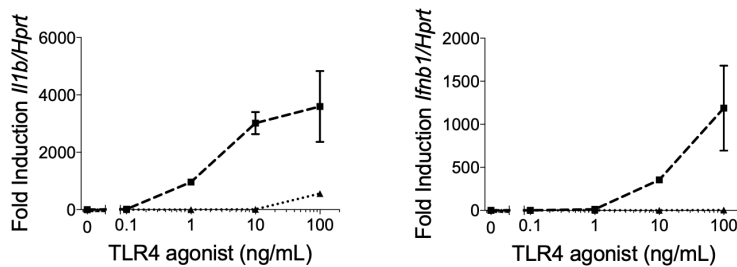

**Supplementary Figure 2. Differential responses to sMPL and E6020 in diverse mouse and human antigen-presenting cells.**

Murine RAW 264.7 and MH-S cell lines, C57BL/6J BMDM and BMDC, and human THP-1 cells, differentiated to macrophages with 100 nM PMA, were stimulated with 0.1 – 100 ng/mL of synthetic TLR4 agonists E6020 or sMPL (PHAD<sup>®</sup>) for 2 h (macrophages) or 4 h (dendritic cells). Levels of IL-1 $\beta$  and IFN- $\beta$  mRNA relative to HPRT mRNA, were measured by qRT-PCR. Enhanced signaling of both MyD88 and TRIF pathways and greater “TRIF-bias” by E6020 are preserved across these diverse cell types.

### Supplementary Figure 3.

A.

#### Breakdown of DE genes, FDR < 0.05

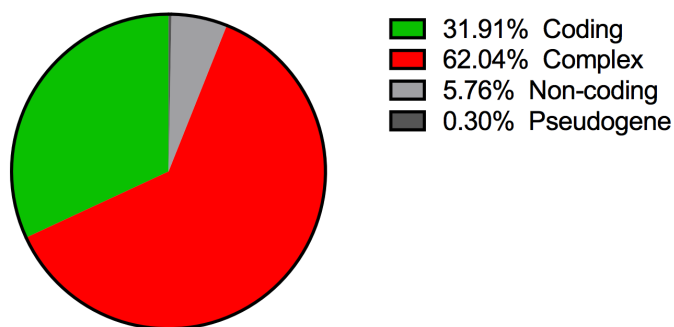

A. Grouping of differentially expressed (DE) genes (average of three biological replicates) showed > 2-fold difference in any comparison: sMPL vs. Control, E6020 vs. Control, or E6020 vs. sMPL) with false discovery rate (FDR) < 0.05. Protein-coding genes (Coding and Complex) made up the vast majority of DE genes that passed this QC threshold.

B.

#### Similarly regulated by sMPL and E6020

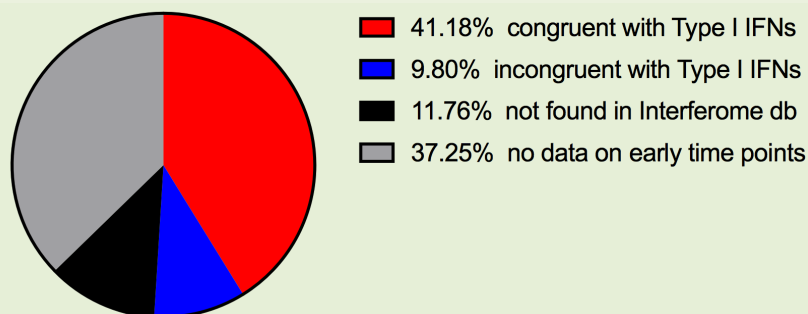

#### More induced/suppressed by E6020 than by sMPL

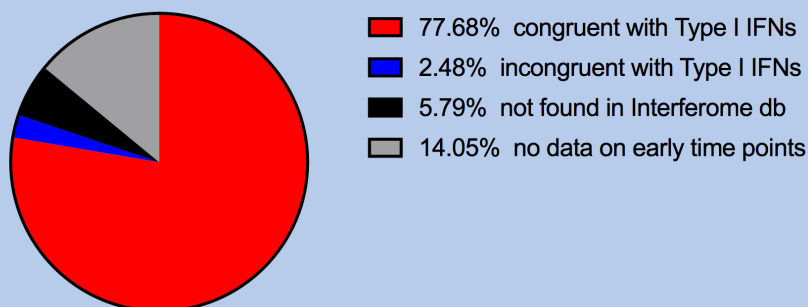

B. Highly differentially expressed protein coding genes (+/- 4-fold or more compared to untreated) were interrogated against Type I IFN expression data compiled in the Interferome.org database (db), and grouped as to whether or not their induction/suppression in our dataset was congruent with Type I IFNs. The majority of DE genes that were more induced by E6020 than by sMPL (blue background in Suppl. Table 2, above) are congruent with Type I IFN regulation.

Interferome.org reference:

Rusinova, I.; Forster, S.; Yu, S.; Kannan, A.; Masse, M.; Cumming, H.; Chapman, R.; Hertzog, P.J. INTERFEROME v2. 0: an updated database of annotated interferon-regulated genes. *Nucleic Acids Research*. 2013 January; 41 (database issue): D1040-D1046.

**Supplementary Table I.** Differentially expressed genes. Color coding: Green--Similar induction/suppression by both sMPL and E6020; Blue--Stronger induction/suppression by E6020 than sMPL (used as input for analysis in Supplementary Figure 1B). Colorless--Low induction by either sMPL or E6020.

| Gene Symbol          | Fold Change (linear) (sMPL vs. Control) | Fold Change (linear) (E6020 vs. Control) |
|----------------------|-----------------------------------------|------------------------------------------|
| <i>Il1b</i>          | 97.62                                   | 156.51                                   |
| <i>Irg1</i>          | 67.01                                   | 83.30                                    |
| <i>Ifit1</i>         | 2.93                                    | 78.10                                    |
| <i>Mx1</i>           | 2.78                                    | 67.14                                    |
| <i>Cxcl2</i>         | 72.96                                   | 63.01                                    |
| <i>Tnfsf9</i>        | 21.24                                   | 59.48                                    |
| <i>Mx2</i>           | 2.24                                    | 55.12                                    |
| <i>Ccl5</i>          | 13.44                                   | 54.49                                    |
| <i>Tgtp2</i>         | < 2                                     | 41.30                                    |
| <i>Tnf</i>           | 33.39                                   | 40.81                                    |
| <i>Ccl4</i>          | 7.26                                    | 39.37                                    |
| <i>Cxcl10</i>        | 4.95                                    | 37.27                                    |
| <i>Cd69</i>          | 12.70                                   | 33.72                                    |
| <i>Olr1</i>          | 19.08                                   | 32.12                                    |
| <i>I830012O16Rik</i> | < 2                                     | 29.12                                    |
| <i>Rnd1</i>          | 10.40                                   | 26.94                                    |
| <i>Rsad2</i>         | < 2                                     | 26.84                                    |
| <i>Fam26f</i>        | 5.24                                    | 26.08                                    |
| <i>Cmpk2</i>         | < 2                                     | 24.45                                    |
| <i>Nfkbiz</i>        | 12.91                                   | 23.75                                    |
| <i>Il6</i>           | < 2                                     | 23.27                                    |
| <i>Tnfsf4</i>        | < 2                                     | 22.54                                    |
| <i>Il12b</i>         | 5.95                                    | 21.78                                    |
| <i>Clec4e</i>        | 23.01                                   | 21.53                                    |
| <i>Ifit2</i>         | < 2                                     | 21.28                                    |
| <i>Trim30c</i>       | < 2                                     | 20.69                                    |
| <i>Ptgs2</i>         | < 2                                     | 20.25                                    |
| <i>Tnfsf15</i>       | 2.23                                    | 20.08                                    |
| <i>Oasl1</i>         | 2.03                                    | 19.48                                    |
| <i>Cd40</i>          | 6.41                                    | 19.30                                    |
| <i>Il23a</i>         | < 2                                     | 16.80                                    |
| <i>Cxcl9</i>         | < 2                                     | 16.79                                    |
| <i>Cxcl1</i>         | 18.69                                   | 16.60                                    |
| <i>Slfn1</i>         | < 2                                     | 16.15                                    |
| <i>Ifih1</i>         | 2.18                                    | 15.80                                    |
| <i>Serpinb2</i>      | < 2                                     | 14.69                                    |
| <i>Il27</i>          | 2.62                                    | 14.30                                    |
| <i>F830016B08Rik</i> | < 2                                     | 14.22                                    |
| <i>Nlrp3</i>         | 11.53                                   | 13.72                                    |
| <i>Gbp2</i>          | 4.25                                    | 13.65                                    |
| <i>Icam1</i>         | 9.22                                    | 13.40                                    |
| <i>Il1a</i>          | 7.44                                    | 13.28                                    |
| <i>Gbp2b</i>         | 3.93                                    | 13.03                                    |
| <i>Gm4951</i>        | < 2                                     | 12.38                                    |
| <i>Ifit3</i>         | < 2                                     | 12.37                                    |
| <i>Gm12185</i>       | < 2                                     | 12.33                                    |

|                  |       |       |
|------------------|-------|-------|
| <i>Gbp3</i>      | 2.47  | 12.3  |
| <i>Edn1</i>      | < 2   | 12.14 |
| <i>Gbp10</i>     | 2.35  | 11.84 |
| <i>Tarm1</i>     | 4.73  | 11.80 |
| <i>Usp18</i>     | < 2   | 11.35 |
| <i>Gbp7</i>      | 2.53  | 11.28 |
| <i>Gpr84</i>     | 14.29 | 11.00 |
| <i>Gm6377</i>    | 5.14  | 10.98 |
| <i>ligp1</i>     | < 2   | 10.98 |
| <i>Irf1</i>      | 4.66  | 10.57 |
| <i>Nfkbie</i>    | 8.69  | 10.51 |
| <i>Cxcl3</i>     | 8.41  | 10.38 |
| <i>Ifi203</i>    | 3.56  | 10.28 |
| <i>Ccl7</i>      | < 2   | 9.63  |
| <i>AW112010</i>  | 2.70  | 9.59  |
| <i>Nfkbia</i>    | 6.94  | 9.33  |
| <i>Mefv</i>      | 9.92  | 9.14  |
| <i>Plet1</i>     | < 2   | 8.99  |
| <i>Gm14446</i>   | < 2   | 8.98  |
| <i>Serpine1</i>  | < 2   | 8.81  |
| <i>Ccl3</i>      | 6.04  | 8.80  |
| <i>Sdc4</i>      | 3.64  | 8.73  |
| <i>Slc7a2</i>    | < 2   | 8.70  |
| <i>Gbp4</i>      | < 2   | 8.69  |
| <i>Ccl2</i>      | < 2   | 8.56  |
| <i>Igtp</i>      | < 2   | 8.51  |
| <i>Rab11fip1</i> | 4.84  | 8.51  |
| <i>Tnfaip3</i>   | 5.12  | 8.46  |
| <i>Parp14</i>    | 2.54  | 8.35  |
| <i>Ifi44</i>     | < 2   | 8.20  |
| <i>Tlr2</i>      | 5.91  | 7.98  |
| <i>Vcam1</i>     | < 2   | 7.69  |
| <i>Icosl</i>     | 10.36 | 7.63  |
| <i>Adora2a</i>   | 4.87  | 7.62  |
| <i>Ccl12</i>     | < 2   | 7.58  |
| <i>Isg15</i>     | < 2   | 7.53  |
| <i>Mmp13</i>     | < 2   | 7.51  |
| <i>H2-M2</i>     | 5.54  | 7.51  |
| <i>Nupr1</i>     | 3.2   | 7.37  |
| <i>Mndal</i>     | 2.39  | 7.31  |
| <i>Cd83</i>      | 5.45  | 7.27  |
| <i>Slfn8</i>     | 2.09  | 7.00  |
| <i>Tnfp3</i>     | 5.53  | 6.72  |
| <i>Rtp4</i>      | < 2   | 6.70  |
| <i>Gpr85</i>     | 4.77  | 6.64  |
| <i>Irgm2</i>     | < 2   | 6.42  |
| <i>Ccrn4l</i>    | < 2   | 6.41  |
| <i>Ch25h</i>     | < 2   | 6.41  |
| <i>Pyhin1</i>    | < 2   | 6.39  |
| <i>Fnbp1l</i>    | 4.39  | 6.37  |
| <i>Gbp11</i>     | < 2   | 6.33  |

|                 |      |      |
|-----------------|------|------|
| <i>Peli1</i>    | 2.41 | 6.26 |
| <i>Gm4955</i>   | < 2  | 6.17 |
| <i>Il12a</i>    | 2.84 | 6.16 |
| <i>Slc2a6</i>   | 3.85 | 6.15 |
| <i>Slc25a37</i> | 2.13 | 6.08 |
| <i>Sele</i>     | < 2  | 6.01 |
| <i>Ehd1</i>     | 5.09 | 5.93 |
| <i>Il15</i>     | < 2  | 5.88 |
| <i>Zc3h12c</i>  | 6.49 | 5.87 |
| <i>Ripk2</i>    | 2.79 | 5.87 |
| <i>Ccl2</i>     | 3.29 | 5.83 |
| <i>Traf1</i>    | 4.27 | 5.79 |
| <i>Cd80</i>     | < 2  | 5.75 |
| <i>AI504432</i> | < 2  | 5.70 |
| <i>Xaf1</i>     | < 2  | 5.65 |
| <i>Slfn9</i>    | < 2  | 5.53 |
| <i>BC094916</i> | < 2  | 5.53 |
| <i>Irf7</i>     | < 2  | 5.48 |
| <i>Zbp1</i>     | < 2  | 5.48 |
| <i>Cflar</i>    | 3.68 | 5.46 |
| <i>AA467197</i> | < 2  | 5.41 |
| <i>Oas1b</i>    | < 2  | 5.34 |
| <i>Mnda</i>     | 2.64 | 5.33 |
| <i>Gbp9</i>     | < 2  | 5.31 |
| <i>Irgm1</i>    | < 2  | 5.29 |
| <i>Cish</i>     | < 2  | 5.11 |
| <i>Adm</i>      | < 2  | 5.10 |
| <i>Casp4</i>    | 3.06 | 5.01 |
| <i>Zc3h12a</i>  | 3.33 | 4.85 |
| <i>Ifi202b</i>  | < 2  | 4.85 |
| <i>Jak2</i>     | 2.77 | 4.83 |
| <i>Gem</i>      | 3.01 | 4.83 |
| <i>Stat2</i>    | < 2  | 4.78 |
| <i>Socs3</i>    | < 2  | 4.77 |
| <i>Rnd3</i>     | < 2  | 4.74 |
| <i>BC023105</i> | < 2  | 4.73 |
| <i>Ccl22</i>    | < 2  | 4.70 |
| <i>Stx11</i>    | 3.05 | 4.55 |
| <i>Samd9l</i>   | < 2  | 4.54 |
| <i>Pydc4</i>    | < 2  | 4.53 |
| <i>Rapgef2</i>  | 2.82 | 4.49 |
| <i>Timp1</i>    | < 2  | 4.47 |
| <i>Helz2</i>    | < 2  | 4.46 |
| <i>Gpr132</i>   | 4.81 | 4.46 |
| <i>Ms4a4c</i>   | < 2  | 4.43 |
| <i>Spred1</i>   | 3.16 | 4.42 |
| <i>Malt1</i>    | 3.69 | 4.38 |
| <i>Nfkb2</i>    | 2.99 | 4.38 |
| <i>Slfn2</i>    | 3.40 | 4.33 |
| <i>Pydc3</i>    | < 2  | 4.30 |
| <i>Ccnd2</i>    | < 2  | 4.29 |
| <i>Batf2</i>    | < 2  | 4.28 |
| <i>Mki67</i>    | 2.63 | 4.27 |
| <i>Pstpip2</i>  | 3.16 | 4.27 |
| <i>Phf11d</i>   | < 2  | 4.27 |
| <i>Tfec</i>     | 2.58 | 4.24 |

|                |      |      |
|----------------|------|------|
| <i>Trim21</i>  | < 2  | 4.18 |
| <i>Nfkb1</i>   | 2.95 | 4.15 |
| <i>E2f8</i>    | 2.86 | 4.13 |
| <i>Ddx58</i>   | < 2  | 4.10 |
| <i>Il15ra</i>  | < 2  | 4.10 |
| <i>Csrnp1</i>  | < 2  | 4.09 |
| <i>Herc6</i>   | < 2  | 4.04 |
| <i>Zufsp</i>   | < 2  | 4.03 |
| <i>Cav1</i>    | < 2  | 3.99 |
| <i>Sp140</i>   | < 2  | 3.95 |
| <i>Lcp2</i>    | 2.76 | 3.88 |
| <i>Phf11b</i>  | < 2  | 3.88 |
| <i>Oas2</i>    | < 2  | 3.87 |
| <i>Papd7</i>   | < 2  | 3.86 |
| <i>Nt5c3</i>   | < 2  | 3.84 |
| <i>Rassf4</i>  | 2.98 | 3.83 |
| <i>Gvin1</i>   | < 2  | 3.83 |
| <i>Nr4a3</i>   | < 2  | 3.81 |
| <i>Tap1</i>    | < 2  | 3.80 |
| <i>Cdkn1a</i>  | 2.67 | 3.80 |
| <i>Oas12</i>   | < 2  | 3.79 |
| <i>Daxx</i>    | < 2  | 3.78 |
| <i>Parp9</i>   | < 2  | 3.75 |
| <i>Ell2</i>    | 3.12 | 3.74 |
| <i>Bcl2a1a</i> | 2.63 | 3.71 |
| <i>Gbp8</i>    | < 2  | 3.70 |
| <i>Ddx60</i>   | < 2  | 3.69 |
| <i>Klf7</i>    | 2.87 | 3.69 |
| <i>Vcan</i>    | < 2  | 3.68 |
| <i>Ddhd1</i>   | 2.65 | 3.67 |
| <i>Plat</i>    | < 2  | 3.66 |
| <i>Rasgrp1</i> | 3.05 | 3.66 |
| <i>Bcl3</i>    | 3.50 | 3.64 |
| <i>Pvr</i>     | < 2  | 3.64 |
| <i>Cd274</i>   | < 2  | 3.64 |
| <i>Cd14</i>    | < 2  | 3.63 |
| <i>Cass4</i>   | 2.15 | 3.63 |
| <i>Arhgef3</i> | 2.65 | 3.61 |
| <i>Hcar2</i>   | 2.35 | 3.61 |
| <i>Rcan1</i>   | < 2  | 3.59 |
| <i>Tnfsf10</i> | < 2  | 3.59 |
| <i>Rnf213</i>  | < 2  | 3.58 |
| <i>Nod2</i>    | 2.45 | 3.55 |
| <i>Ptx3</i>    | < 2  | 3.55 |
| <i>Phf11a</i>  | < 2  | 3.55 |
| <i>Dtx3l</i>   | < 2  | 3.54 |
| <i>Inhba</i>   | < 2  | 3.53 |
| <i>Fpr2</i>    | 2.61 | 3.52 |
| <i>Akna</i>    | 2.61 | 3.52 |
| <i>Rel</i>     | 2.97 | 3.51 |
| <i>Mfsd7a</i>  | 2.35 | 3.51 |
| <i>Ifi204</i>  | < 2  | 3.50 |
| <i>Clec5a</i>  | 2.85 | 3.49 |
| <i>Calcl</i>   | < 2  | 3.46 |
| <i>Trim30b</i> | < 2  | 3.43 |
| <i>Met</i>     | < 2  | 3.42 |

|                      |      |      |
|----------------------|------|------|
| <i>Slfn3</i>         | < 2  | 3.42 |
| <i>Slfn4</i>         | < 2  | 3.40 |
| <i>C130026I21Rik</i> | < 2  | 3.38 |
| <i>Tnip1</i>         | 2.83 | 3.37 |
| <i>Itgal</i>         | 3.61 | 3.37 |
| <i>Oas1g</i>         | < 2  | 3.36 |
| <i>Pnp</i>           | < 2  | 3.35 |
| <i>Slc7a11</i>       | 2.50 | 3.33 |
| <i>Orai2</i>         | 2.52 | 3.31 |
| <i>Bcl2a1c</i>       | < 2  | 3.31 |
| <i>Sap30</i>         | < 2  | 3.30 |
| <i>Tmem200b</i>      | < 2  | 3.28 |
| <i>Cfb</i>           | < 2  | 3.27 |
| <i>Tnfaip2</i>       | 2.61 | 3.26 |
| <i>Rgcc</i>          | < 2  | 3.25 |
| <i>Kcna3</i>         | < 2  | 3.25 |
| <i>Kdm6b</i>         | 2.71 | 3.24 |
| <i>Serpina3g</i>     | < 2  | 3.21 |
| <i>Sp110</i>         | < 2  | 3.19 |
| <i>Adamts4</i>       | < 2  | 3.17 |
| <i>LOC100041057</i>  | < 2  | 3.14 |
| <i>Cdc42ep2</i>      | 3.99 | 3.11 |
| <i>Sod2</i>          | 2.67 | 3.11 |
| <i>Arg2</i>          | 2.62 | 3.10 |
| <i>Slfn5</i>         | < 2  | 3.07 |
| <i>Jag1</i>          | < 2  | 3.06 |
| <i>Trim30d</i>       | < 2  | 3.05 |
| <i>Rab32</i>         | < 2  | 3.04 |
| <i>Nos2</i>          | < 2  | 3.04 |
| <i>Fchsd2</i>        | < 2  | 3.03 |
| <i>Rgs16</i>         | < 2  | 3.03 |
| <i>Dyrk2</i>         | 2.20 | 3.00 |
| <i>Pim1</i>          | 2.23 | 2.98 |
| <i>Ralgds</i>        | 4.29 | 2.95 |
| <i>Rnf19b</i>        | 2.81 | 2.95 |
| <i>Setdb2</i>        | < 2  | 2.95 |
| <i>Pnp2</i>          | < 2  | 2.94 |
| <i>Eif2ak2</i>       | < 2  | 2.94 |
| <i>Gdap10</i>        | < 2  | 2.92 |
| <i>Fas</i>           | 2.99 | 2.92 |
| <i>Oas1a</i>         | < 2  | 2.91 |
| <i>Spaca6</i>        | 2.31 | 2.90 |
| <i>Abtb2</i>         | < 2  | 2.89 |
| <i>Marcks1</i>       | < 2  | 2.89 |
| <i>Mt2</i>           | < 2  | 2.88 |
| <i>Tank</i>          | 2.2  | 2.88 |
| <i>Oaf</i>           | < 2  | 2.88 |
| <i>Tagap</i>         | 2.35 | 2.88 |
| <i>1500012F01Rik</i> | < 2  | 2.87 |
| <i>lfi35</i>         | < 2  | 2.87 |
| <i>Mtmr14</i>        | 2.22 | 2.86 |
| <i>Ampd3</i>         | 2.47 | 2.86 |
| <i>Stat1</i>         | < 2  | 2.84 |
| <i>Il17ra</i>        | < 2  | 2.84 |
| <i>Nfkbib</i>        | 2.06 | 2.83 |
| <i>Adora2b</i>       | < 2  | 2.83 |

|                       |      |      |
|-----------------------|------|------|
| <i>F10</i>            | < 2  | 2.82 |
| <i>N4bp1</i>          | 2.25 | 2.81 |
| <i>Jarid2</i>         | < 2  | 2.77 |
| <i>Plek</i>           | < 2  | 2.76 |
| <i>Cdk5r1</i>         | < 2  | 2.74 |
| <i>Stat5a</i>         | < 2  | 2.74 |
| <i>Trim30a</i>        | < 2  | 2.72 |
| <i>Frmd6</i>          | < 2  | 2.70 |
| <i>Il33</i>           | < 2  | 2.69 |
| <i>Hivep2</i>         | < 2  | 2.68 |
| <i>Cd44</i>           | < 2  | 2.64 |
| <i>Sp110</i>          | < 2  | 2.64 |
| <i>Dcp2</i>           | < 2  | 2.63 |
| <i>Zhx2</i>           | < 2  | 2.63 |
| <i>Gm16181</i>        | < 2  | 2.63 |
| <i>Pilra</i>          | 2.66 | 2.63 |
| <i>LOC664787</i>      | < 2  | 2.62 |
| <i>Mapkapk2</i>       | < 2  | 2.61 |
| <i>Serpina3n</i>      | < 2  | 2.60 |
| <i>Ube2l6</i>         | < 2  | 2.59 |
| <i>Kpna3</i>          | < 2  | 2.59 |
| <i>F3</i>             | < 2  | 2.59 |
| <i>Jdp2</i>           | < 2  | 2.59 |
| <i>Ets2</i>           | 2.64 | 2.58 |
| <i>Serpina3f</i>      | < 2  | 2.57 |
| <i>Plscr1</i>         | < 2  | 2.56 |
| <i>Ms4a6c</i>         | < 2  | 2.56 |
| <i>Cst7</i>           | < 2  | 2.56 |
| <i>Zswim4</i>         | 2.33 | 2.54 |
| <i>Znfx1</i>          | < 2  | 2.53 |
| <i>U90926</i>         | < 2  | 2.53 |
| <i>Itgav</i>          | < 2  | 2.50 |
| <i>Ier3</i>           | < 2  | 2.50 |
| <i>Errfi1</i>         | < 2  | 2.50 |
| <i>Pilrb2</i>         | 2.57 | 2.49 |
| <i>Flrt3</i>          | 3.34 | 2.48 |
| <i>Uba7</i>           | < 2  | 2.48 |
| <i>Cxcl11</i>         | < 2  | 2.48 |
| <i>Ahr</i>            | < 2  | 2.47 |
| <i>Sbds</i>           | < 2  | 2.47 |
| <i>Zfp131</i>         | < 2  | 2.46 |
| <i>Rhbdf2</i>         | < 2  | 2.46 |
| <i>Gch1</i>           | < 2  | 2.46 |
| <i>Parp8</i>          | < 2  | 2.46 |
| <i>Dhx58</i>          | < 2  | 2.46 |
| <i>Dusp2</i>          | < 2  | 2.45 |
| <i>Stk40</i>          | < 2  | 2.45 |
| <i>Tiparp</i>         | < 2  | 2.42 |
| <i>Bcl2l11</i>        | < 2  | 2.42 |
| <i>Ptges</i>          | < 2  | 2.41 |
| <i>Lacc1</i>          | < 2  | 2.40 |
| <i>LOC100041034</i>   | < 2  | 2.40 |
| <i>Src</i>            | < 2  | 2.40 |
| <i>1700047I17Rik2</i> | < 2  | 2.39 |
| <i>Tlr7</i>           | < 2  | 2.39 |
| <i>Hdc</i>            | < 2  | 2.39 |

|                       |      |      |
|-----------------------|------|------|
| <i>Cxcl16</i>         | 2.44 | 2.38 |
| <i>Tmem171</i>        | < 2  | 2.37 |
| <i>Gadd45b</i>        | < 2  | 2.37 |
| <i>Hk2</i>            | < 2  | 2.37 |
| <i>Sav1</i>           | < 2  | 2.36 |
| <i>Parp12</i>         | < 2  | 2.36 |
| <i>AW011738</i>       | < 2  | 2.36 |
| <i>Sh3bp5</i>         | < 2  | 2.35 |
| <i>Fam46a</i>         | < 2  | 2.34 |
| <i>Prdm1</i>          | 3.11 | 2.34 |
| <i>Htra4</i>          | < 2  | 2.34 |
| <i>Fam102b</i>        | < 2  | 2.32 |
| <i>Kctd12</i>         | < 2  | 2.32 |
| <i>Bcl2a1d</i>        | < 2  | 2.32 |
| <i>Ppm1k</i>          | < 2  | 2.32 |
| <i>Tnfrsf1b</i>       | 2.10 | 2.31 |
| <i>1700047117Rik2</i> | < 2  | 2.31 |
| <i>Rasa2</i>          | < 2  | 2.31 |
| <i>Csf2</i>           | < 2  | 2.31 |
| <i>Ube2f</i>          | < 2  | 2.30 |
| <i>Gm5431</i>         | < 2  | 2.30 |
| <i>Hspa1a</i>         | < 2  | 2.29 |
| <i>Zfp263</i>         | 2.55 | 2.29 |
| <i>Gyk</i>            | < 2  | 2.29 |
| <i>P2ry13</i>         | < 2  | 2.29 |
| <i>Clic4</i>          | < 2  | 2.28 |
| <i>Ccdc86</i>         | < 2  | 2.28 |
| <i>Slc39a14</i>       | 2.13 | 2.28 |
| <i>Naa25</i>          | < 2  | 2.28 |
| <i>Ccl9</i>           | < 2  | 2.28 |
| <i>Mkl1</i>           | < 2  | 2.27 |
| <i>Gas7</i>           | < 2  | 2.27 |
| <i>Itga4</i>          | < 2  | 2.27 |
| <i>Mapk14</i>         | < 2  | 2.26 |
| <i>Kcnn4</i>          | < 2  | 2.25 |
| <i>Klf2</i>           | < 2  | 2.24 |
| <i>Tshz1</i>          | < 2  | 2.24 |
| <i>Rasgef1b</i>       | 2.63 | 2.24 |
| <i>LOC100041034</i>   | < 2  | 2.24 |
| <i>Zcchc2</i>         | < 2  | 2.24 |
| <i>Il10</i>           | < 2  | 2.24 |
| <i>Top1</i>           | < 2  | 2.24 |
| <i>Car13</i>          | < 2  | 2.23 |
| <i>Sgms2</i>          | < 2  | 2.23 |
| <i>Tlr1</i>           | 2.55 | 2.23 |
| <i>Lcn2</i>           | < 2  | 2.23 |
| <i>Vezf1</i>          | < 2  | 2.22 |
| <i>Hivep1</i>         | < 2  | 2.22 |
| <i>Dusp1</i>          | < 2  | 2.21 |
| <i>Xkr8</i>           | < 2  | 2.20 |
| <i>Slc31a2</i>        | 2.40 | 2.20 |
| <i>Tnfaip6</i>        | < 2  | 2.19 |
| <i>Mmp14</i>          | 2.15 | 2.19 |
| <i>Slc4a7</i>         | < 2  | 2.18 |
| <i>Bcl2a1b</i>        | < 2  | 2.18 |
| <i>Fam129a</i>        | < 2  | 2.17 |

|                |       |       |
|----------------|-------|-------|
| <i>Zc3h7a</i>  | < 2   | 2.17  |
| <i>Pilrb1</i>  | 2.37  | 2.16  |
| <i>Mtmr7</i>   | < 2   | 2.15  |
| <i>Cers6</i>   | < 2   | 2.14  |
| <i>Arl5c</i>   | 2.70  | 2.14  |
| <i>Nod1</i>    | < 2   | 2.14  |
| <i>Apobec3</i> | < 2   | 2.14  |
| <i>Agrn</i>    | < 2   | 2.13  |
| <i>Irf47</i>   | < 2   | 2.13  |
| <i>Ccnyl1</i>  | < 2   | 2.12  |
| <i>Ptprj</i>   | < 2   | 2.12  |
| <i>Irfb1</i>   | < 2   | 2.12  |
| <i>Myd88</i>   | < 2   | 2.10  |
| <i>Cdc14a</i>  | < 2   | 2.09  |
| <i>Foxp4</i>   | < 2   | 2.09  |
| <i>Psmb9</i>   | < 2   | 2.09  |
| <i>Snx20</i>   | < 2   | 2.08  |
| <i>Rbm7</i>    | < 2   | 2.08  |
| <i>Nfkbid</i>  | < 2   | 2.08  |
| <i>Nrip1</i>   | 2.17  | 2.08  |
| <i>Clcf1</i>   | < 2   | 2.07  |
| <i>Sep11</i>   | < 2   | 2.07  |
| <i>Zfp800</i>  | < 2   | 2.06  |
| <i>Gsap</i>    | 2.75  | 2.06  |
| <i>Nlrc5</i>   | < 2   | 2.06  |
| <i>Snx10</i>   | < 2   | 2.05  |
| <i>Enpp4</i>   | < 2   | 2.05  |
| <i>Fabp3</i>   | < 2   | 2.05  |
| <i>Relb</i>    | 2.08  | 2.04  |
| <i>Baz1a</i>   | < 2   | 2.04  |
| <i>Ugcg</i>    | < 2   | 2.04  |
| <i>Marcks</i>  | < 2   | 2.04  |
| <i>Fam208b</i> | < 2   | 2.04  |
| <i>Nipal1</i>  | < 2   | 2.04  |
| <i>Btg1</i>    | 2.29  | 2.03  |
| <i>Abhd17c</i> | 2.03  | 2.03  |
| <i>Rap2c</i>   | < 2   | 2.02  |
| <i>Gtf2b</i>   | < 2   | 2.01  |
| <i>Rbpj</i>    | < 2   | 2.01  |
| <i>Klf3</i>    | < 2   | 2.01  |
| <i>Lancl2</i>  | < 2   | 2.01  |
| <i>Hck</i>     | < 2   | 2.01  |
| <i>Lztfl1</i>  | < 2   | 2.01  |
| <i>Rab20</i>   | 2.91  | < 2   |
| <i>Herpud1</i> | 2.51  | < 2   |
| <i>Birc3</i>   | 2.42  | < 2   |
| <i>Samsn1</i>  | 2.41  | < 2   |
| <i>Vasp</i>    | 2.17  | < 2   |
| <i>Sowahc</i>  | 2.11  | < 2   |
| <i>Pdgfb</i>   | 2.08  | > -2  |
| <i>Skil</i>    | 2.01  | < 2   |
| <i>Irf8</i>    | -2.17 | > -2  |
| <i>Sgk1</i>    | > -2  | -2.01 |
| <i>N4bp2l1</i> | > -2  | -2.02 |
| <i>Zfp36l2</i> | > -2  | -2.03 |
| <i>Coq10a</i>  | > -2  | -2.03 |



|                      |       |       |
|----------------------|-------|-------|
| <i>Prune</i>         | > -2  | -2.04 |
| <i>Fam178a</i>       | > -2  | -2.05 |
| <i>Wee1</i>          | > -2  | -2.07 |
| <i>Tbc1d2</i>        | > -2  | -2.07 |
| <i>Ercc6</i>         | > -2  | -2.07 |
| <i>Clk4</i>          | > -2  | -2.07 |
| <i>Tet3</i>          | > -2  | -2.07 |
| <i>Ddx26b</i>        | > -2  | -2.08 |
| <i>Dennd4c</i>       | > -2  | -2.09 |
| <i>Ankrd12</i>       | > -2  | -2.09 |
| <i>Vps18</i>         | > -2  | -2.10 |
| <i>Flcn</i>          | > -2  | -2.11 |
| <i>1810011H11Rik</i> | > -2  | -2.12 |
| <i>Lpxn</i>          | > -2  | -2.12 |
| <i>Olfr111</i>       | > -2  | -2.16 |
| <i>Gas2l3</i>        | > -2  | -2.19 |
| <i>Bhlhe41</i>       | > -2  | -2.19 |
| <i>Gm4787</i>        | > -2  | -2.19 |
| <i>Fbxl20</i>        | > -2  | -2.20 |
| <i>Tcp11l2</i>       | > -2  | -2.20 |
| <i>Kcnj2</i>         | > -2  | -2.21 |
| <i>Ldlrap1</i>       | > -2  | -2.23 |
| <i>Kcnq1ot1</i>      | > -2  | -2.23 |
| <i>Gadd45a</i>       | > -2  | -2.24 |
| <i>Arl11</i>         | > -2  | -2.25 |
| <i>Tmem126b</i>      | > -2  | -2.25 |
| <i>Plekhn2</i>       | > -2  | -2.26 |
| <i>Apobec1</i>       | > -2  | -2.27 |
| <i>Ypel2</i>         | > -2  | -2.27 |
| <i>B430306N03Rik</i> | > -2  | -2.30 |
| <i>Mnt</i>           | > -2  | -2.39 |
| <i>Jun</i>           | > -2  | -2.39 |
| <i>Rgs2</i>          | -2.61 | -2.41 |
| <i>Lonrf3</i>        | > -2  | -2.41 |
| <i>Rnf144b</i>       | > -2  | -2.46 |
| <i>Tec</i>           | > -2  | -2.47 |
| <i>Impact</i>        | > -2  | -2.47 |
| <i>Stard9</i>        | > -2  | -2.47 |
| <i>Klhl6</i>         | > -2  | -2.48 |
| <i>Pwwp2b</i>        | > -2  | -2.51 |
| <i>Cnr2</i>          | > -2  | -2.52 |
| <i>Ddi2</i>          | > -2  | -2.55 |
| <i>Rttn</i>          | > -2  | -2.55 |

|                      |       |        |
|----------------------|-------|--------|
| <i>D130007C19Rik</i> | > -2  | -2.55  |
| <i>Cipc</i>          | > -2  | -2.60  |
| <i>5430435G22Rik</i> | > -2  | -2.61  |
| <i>Gpr183</i>        | > -2  | -2.62  |
| <i>Samd8</i>         | > -2  | -2.67  |
| <i>Snx24</i>         | > -2  | -2.68  |
| <i>Atf7ip</i>        | > -2  | -2.68  |
| <i>Fnip2</i>         | -2.02 | -2.72  |
| <i>Slc26a11</i>      | > -2  | -2.74  |
| <i>Akap10</i>        | > -2  | -2.77  |
| <i>Ddit3</i>         | > -2  | -2.78  |
| <i>Ccdc125</i>       | > -2  | -2.79  |
| <i>1700017B05Rik</i> | > -2  | -2.84  |
| <i>Slc30a1</i>       | > -2  | -2.84  |
| <i>Pparg</i>         | > -2  | -2.85  |
| <i>Lpin1</i>         | > -2  | -2.85  |
| <i>Klhl24</i>        | > -2  | -2.86  |
| <i>Trp53inp1</i>     | > -2  | -2.89  |
| <i>Crebrf</i>        | > -2  | -2.90  |
| <i>Sh2d3c</i>        | > -2  | -2.94  |
| <i>Lpar6</i>         | -2.42 | -3.02  |
| <i>Plekhn1</i>       | > -2  | -3.02  |
| <i>Gpr157</i>        | > -2  | -3.04  |
| <i>Atf7ip</i>        | > -2  | -3.18  |
| <i>Tifab</i>         | -2.16 | -3.29  |
| <i>Fgd4</i>          | > -2  | -3.31  |
| <i>Foxo3</i>         | -2.06 | -3.59  |
| <i>Fam83f</i>        | -2.09 | -3.70  |
| <i>Irf2bp2</i>       | > -2  | -3.72  |
| <i>Gadd45g</i>       | -2.97 | -3.75  |
| <i>Fam214a</i>       | -2.06 | -3.89  |
| <i>Lrrc14b</i>       | -2.24 | -3.89  |
| <i>Arrdc3</i>        | -2.4  | -4.65  |
| <i>Mafb</i>          | > -2  | -4.74  |
| <i>Cebpa</i>         | -2.82 | -5.03  |
| <i>Lyl1</i>          | > -2  | -5.16  |
| <i>Cd300lb</i>       | > -2  | -5.37  |
| <i>Sesn1</i>         | > -2  | -5.59  |
| <i>Arhgap25</i>      | -2.15 | -8.15  |
| <i>Cxcr4</i>         | -2.18 | -8.46  |
| <i>Fbxo32</i>        | > -2  | -13.67 |

**Supplementary Table II.** Gene expression of A) MyD88-dependent genes, B) TRIF-dependent genes, and C) MyD88- and TRIF-co-dependent genes, 2 hours after stimulation with 100 ng/mL sMPL or E6020.

| <b>A</b><br>Gene Symbol | Description                                                                           | Fold<br>Change<br>sMPL vs<br>Control | Fold<br>Change<br>E6020 vs<br>Control | References for MyD88-<br>dependence |
|-------------------------|---------------------------------------------------------------------------------------|--------------------------------------|---------------------------------------|-------------------------------------|
| <i>Ccl3</i>             | chemokine (C-C motif) ligand 3                                                        | 6.04                                 | 8.80                                  | [56, 58]                            |
| <i>Cd38</i>             | CD38 antigen                                                                          | 2.54                                 | 2.95                                  | [56]                                |
| <i>Ch25h</i>            | cholesterol 25-hydroxylase                                                            | 3.73                                 | 6.41                                  | [56]                                |
| <i>Clec4e</i>           | C-type lectin domain family 4, member e                                               | 23.01                                | 21.53                                 | [59]                                |
| <i>Cxcl1</i>            | chemokine (C-X-C motif) ligand 1                                                      | 18.69                                | 16.60                                 | [56, 58, 60-62]                     |
| <i>Cxcl2</i>            | chemokine (C-X-C motif) ligand 2                                                      | 72.96                                | 63.01                                 | [56, 58-62]                         |
| <i>Cxcl3</i>            | chemokine (C-X-C motif) ligand 3                                                      | 8.41                                 | 10.38                                 | [58]                                |
| <i>Ednrb</i>            | endothelin receptor type B                                                            | < 2.00                               | 2.54                                  | [56]                                |
| <i>Fpr1</i>             | formyl peptide receptor 1                                                             | 4.70                                 | 4.30                                  | [56]                                |
| <i>Fpr2</i>             | formyl peptide receptor 2; formyl peptide receptor 3                                  | 2.61                                 | 3.52                                  | [56]                                |
| <i>Il10</i>             | interleukin 10                                                                        | < 2.00                               | 2.24                                  | [58-61]                             |
| <i>Il1b</i>             | interleukin 1 beta                                                                    | 97.62                                | 156.51                                | [56, 58-64, 67]                     |
| <i>Malt1</i>            | mucosa associated lymphoid tissue lymphoma translocation gene 1                       | 3.69                                 | 4.38                                  | [63]                                |
| <i>Nfkbie</i>           | nuclear factor of kappa light polypeptide gene enhancer in B cells inhibitor, epsilon | 8.69                                 | 10.51                                 | [63]                                |
| <i>Nfkbiz</i>           | nuclear factor of kappa light polypeptide gene enhancer in B cells inhibitor, zeta    | 12.91                                | 23.75                                 | [56, 58, 62]                        |
| <i>Pilra</i>            | paired immunoglobulin-like type 2 receptor alpha                                      | 2.66                                 | 2.63                                  | [56]                                |
| <i>Tank</i>             | TRAF family member-associated Nf-kappa B activator                                    | 2.20                                 | 2.88                                  | [63]                                |
| <i>Tlr2</i>             | toll-like receptor 2                                                                  | 5.91                                 | 7.98                                  | [59]                                |
| <i>Tnf</i>              | tumor necrosis factor                                                                 | 33.39                                | 40.81                                 | [56, 59-64, 67-69]                  |

| <b>B</b><br>Gene Symbol | Description                                               | Fold<br>Change<br>sMPL vs<br>Control | Fold<br>Change<br>E6020 vs<br>Control | References for TRIF-dependence |
|-------------------------|-----------------------------------------------------------|--------------------------------------|---------------------------------------|--------------------------------|
| <i>Ccnd2</i>            | cyclin D2                                                 | < 2.00                               | 4.29                                  | [57, 63]                       |
| <i>Cd40</i>             | CD40 antigen                                              | 6.41                                 | 19.30                                 | [57]                           |
| <i>Cdkn1a</i>           | cyclin-dependent kinase inhibitor 1A (P21)                | 2.67                                 | 3.80                                  | [64]                           |
| <i>Cfb</i>              | complement factor B                                       | < 2.00                               | 3.27                                  | [57]                           |
| <i>Cmpk2</i>            | cytidine monophosphate (UMP-CMP) kinase 2, mitochondrial  | < 2.00                               | 24.45                                 | [56, 60, 64]                   |
| <i>Cxcl10</i>           | chemokine (C-X-C motif) ligand 10                         | 4.95                                 | 37.27                                 | [56-60, 63-65, 69, 70]         |
| <i>Cxcl11</i>           | chemokine (C-X-C motif) ligand 11                         | < 2.00                               | 2.48                                  | [56]                           |
| <i>Eif2ak2</i>          | eukaryotic translation initiation factor 2-alpha kinase 2 | < 2.00                               | 2.94                                  | [65]                           |

|                |                                                                                                      |        |       |                     |
|----------------|------------------------------------------------------------------------------------------------------|--------|-------|---------------------|
| <i>Gbp2</i>    | guanylate binding protein 2                                                                          | 4.25   | 13.65 | [64, 65]            |
| <i>Gbp4</i>    | guanylate binding protein 4                                                                          | < 2.00 | 8.69  | [64]                |
| <i>Hspa1a</i>  | heat shock protein 1A                                                                                | < 2.00 | 2.29  | [59]                |
| <i>Ifi202b</i> | interferon activated gene 202B; interferon activated gene 205; interferon-activable protein 202-like | 2.02   | 4.85  | [57, 64]            |
| <i>Ifi203</i>  | interferon activated gene 203; flocculation protein FLO11-like; predicted gene 16340                 | 3.56   | 10.28 | [57, 64]            |
| <i>Ifi204</i>  | interferon activated gene 204                                                                        | < 2.00 | 3.50  | [57, 64]            |
| <i>Ifi47</i>   | interferon gamma inducible protein 47; olfactory receptor 56; interferon gamma inducible protein     | < 2.00 | 2.13  | [63, 64]            |
| <i>Ifit1</i>   | interferon-induced protein with tetratricopeptide repeats 1                                          | 2.93   | 78.10 | [56-58, 60, 63, 65] |
| <i>Ifit2</i>   | interferon-induced protein with tetratricopeptide repeats 2                                          | < 2.00 | 21.28 | [56, 63-65]         |
| <i>Ifit3</i>   | interferon-induced protein with tetratricopeptide repeats 3                                          | < 2.00 | 12.37 | [57, 58, 60, 63-65] |
| <i>Ifnb1</i>   | interferon beta 1, fibroblast; interferon beta 1 fibroblast                                          | < 2.00 | 2.12  | [59, 64, 67-70]     |
| <i>Igtp</i>    | interferon gamma induced GTPase                                                                      | < 2.00 | 8.51  | [57, 63, 64]        |
| <i>Iigp1</i>   | interferon inducible GTPase 1                                                                        | < 2.00 | 10.98 | [63]                |
| <i>Il15</i>    | interleukin 15                                                                                       | < 2.00 | 5.88  | [63]                |
| <i>Il15ra</i>  | interleukin 15 receptor, alpha chain                                                                 | < 2.00 | 4.10  | [57]                |
| <i>Il23a</i>   | interleukin 23, alpha subunit p19                                                                    | 3.18   | 16.80 | [57]                |
| <i>Il33</i>    | interleukin 33                                                                                       | < 2.00 | 2.69  | [66]                |
| <i>Inhba</i>   | inhibin beta-A                                                                                       | < 2.00 | 3.53  | [65]                |
| <i>Irf7</i>    | interferon regulatory factor 7                                                                       | < 2.00 | 5.48  | [63-65]             |
| <i>Irgm1</i>   | immunity-related GTPase family M member 1                                                            | < 2.00 | 5.29  | [57, 63, 64]        |
| <i>Irgm2</i>   | immunity-related GTPase family M member 2                                                            | < 2.00 | 6.42  | [57]                |
| <i>Isg15</i>   | ISG15 ubiquitin-like modifier                                                                        | < 2.00 | 7.53  | [56, 64, 65]        |
| <i>Mki67</i>   | antigen identified by monoclonal antibody Ki 67                                                      | 2.63   | 4.27  | [56]                |
| <i>Mmp13</i>   | matrix metalloproteinase 13                                                                          | 2.37   | 7.51  | [63]                |
| <i>Mnda</i>    | myeloid cell nuclear differentiation antigen                                                         | 2.64   | 5.33  | [64, 65]            |
| <i>Ms4a4c</i>  | membrane-spanning 4-domains, subfamily A, member 4C                                                  | < 2.00 | 4.43  | [56]                |
| <i>Mx1</i>     | myxovirus (influenza virus) resistance 1                                                             | 2.78   | 67.14 | [63-65]             |
| <i>Mx2</i>     | myxovirus (influenza virus) resistance 2                                                             | 2.24   | 55.12 | [57, 63, 64]        |
| <i>Nos2</i>    | nitric oxide synthase 2, inducible                                                                   | < 2.00 | 3.04  | [63, 64, 69, 72]    |
| <i>Nt5c3</i>   | 5-nucleotidase, cytosolic III                                                                        | < 2.00 | 3.84  | [64]                |
| <i>Oas1b</i>   | 2-5 oligoadenylate synthetase 1B                                                                     | < 2.00 | 5.34  | [63]                |
| <i>Oas2</i>    | 2-5 oligoadenylate synthetase 2                                                                      | < 2.00 | 3.87  | [63]                |
| <i>Oasl1</i>   | 2-5 oligoadenylate synthetase-like 1                                                                 | 2.03   | 19.48 | [56, 63, 65]        |
| <i>Oasl2</i>   | 2-5 oligoadenylate synthetase-like 2                                                                 | < 2.00 | 3.79  | [65]                |
| <i>Pyhin1</i>  | pyrin and HIN domain family, member 1                                                                | < 2.00 | 6.39  | [65]                |
| <i>Ripk2</i>   | receptor (TNFRSF)-interacting serine-threonine kinase 2                                              | 2.79   | 5.87  | [57]                |
| <i>Rsad2</i>   | radical S-adenosyl methionine domain containing 2                                                    | < 2.00 | 26.84 | [56-58, 60, 64]     |
| <i>Slfn1</i>   | schlafen 1                                                                                           | < 2.00 | 16.15 | [63]                |
| <i>Slfn8</i>   | schlafen 8                                                                                           | 2.09   | 7.00  | [63, 64]            |

|                |                                                             |        |       |          |
|----------------|-------------------------------------------------------------|--------|-------|----------|
| <i>Stat1</i>   | signal transducer and activator of transcription 1          | < 2.00 | 2.84  | [64]     |
| <i>Stat2</i>   | signal transducer and activator of transcription 2          | < 2.00 | 4.78  | [64]     |
| <i>Stat5a</i>  | signal transducer and activator of transcription 5A         | < 2.00 | 2.74  | [65]     |
| <i>Tap1</i>    | transporter 1, ATP-binding cassette, sub-family B (MDR/TAP) | < 2.00 | 3.8   | [65]     |
| <i>Tgtp2</i>   | T cell specific GTPase 2; T cell specific GTPase 1          | < 2.00 | 41.3  | [64]     |
| <i>Tlr3</i>    | toll-like receptor 3                                        | < 2.00 | 2.23  | [57, 63] |
| <i>Tnfsf10</i> | tumor necrosis factor (ligand) superfamily, member 10       | < 2.00 | 3.59  | [57]     |
| <i>Trim21</i>  | tripartite motif-containing 21                              | < 2.00 | 4.18  | [64]     |
| <i>Trim30a</i> | tripartite motif-containing 30A                             | < 2.00 | 2.72  | [64]     |
| <i>Usp18</i>   | ubiquitin specific peptidase 18                             | < 2.00 | 11.35 | [64]     |

| <b>C</b><br>Gene<br>Symbol | Description                                                                         | Fold<br>Change<br>sMPL vs<br>Control | Fold<br>Change<br>E6020 vs<br>Control | References for MyD88- and<br>TRIF-dependence |
|----------------------------|-------------------------------------------------------------------------------------|--------------------------------------|---------------------------------------|----------------------------------------------|
| <i>Ccl12</i>               | chemokine (C-C motif) ligand 12                                                     | < 2.00                               | 7.58                                  | [57, 64]                                     |
| <i>Ccl2</i>                | chemokine (C-C motif) ligand 2                                                      | 3.84                                 | 8.56                                  | [58, 59, 64, 65]                             |
| <i>Ccl4</i>                | chemokine (C-C motif) ligand 4                                                      | 7.26                                 | 39.37                                 | [56, 57, 60, 61]                             |
| <i>Ccl5</i>                | chemokine (C-C motif) ligand 5                                                      | 13.44                                | 54.49                                 | [56, 60, 64, 67, 70, 71]                     |
| <i>Cd14</i>                | CD14 antigen                                                                        | 2.49                                 | 3.63                                  | [59]                                         |
| <i>Csf2</i>                | colony stimulating factor 2 (granulocyte-macrophage)                                | < 2.00                               | 2.31                                  | [59, 61]                                     |
| <i>Il12a</i>               | interleukin 12a                                                                     | 2.84                                 | 6.16                                  | [56, 59, 64]                                 |
| <i>Il12b</i>               | interleukin 12b                                                                     | 5.95                                 | 21.78                                 | [57, 60, 61, 63, 64]                         |
| <i>Il1a</i>                | interleukin 1 alpha                                                                 | 7.44                                 | 13.28                                 | [56, 59-62]                                  |
| <i>Il6</i>                 | interleukin 6                                                                       | 3.10                                 | 23.27                                 | [56-61, 63, 64, 68, 69, 72]                  |
| <i>Irf1</i>                | interferon regulatory factor 1                                                      | 4.66                                 | 10.57                                 | [56, 57, 60, 62, 64]                         |
| <i>Lztfl1</i>              | leucine zipper transcription factor-like 1                                          | < 2.00                               | 2.01                                  | [56]                                         |
| <i>Met</i>                 | met proto-oncogene                                                                  | < 2.00                               | 3.42                                  | [56]                                         |
| <i>Myd88</i>               | myeloid differentiation primary response gene 88                                    | < 2.00                               | 2.10                                  | [59, 64]                                     |
| <i>Nfkb1</i>               | nuclear factor of kappa light polypeptide gene enhancer in B cells 1, p105          | 2.95                                 | 4.15                                  | [59]                                         |
| <i>Nfkbia</i>              | nuclear factor of kappa light polypeptide gene enhancer in B cells inhibitor, alpha | 6.94                                 | 9.33                                  | [59, 62]                                     |
| <i>Peli1</i>               | pellino 1                                                                           | 2.41                                 | 6.26                                  | [59]                                         |
| <i>Pstpip2</i>             | proline-serine-threonine phosphatase-interacting protein 2                          | 3.16                                 | 4.27                                  | [56]                                         |
| <i>Ptgs2</i>               | prostaglandin-endoperoxide synthase 2                                               | 8.76                                 | 20.25                                 | [56, 59-61]                                  |
| <i>Rel</i>                 | reticuloendotheliosis oncogene                                                      | 2.97                                 | 3.51                                  | [59, 64]                                     |
| <i>Serpine1</i>            | serine (or cysteine) peptidase inhibitor, clade E, member 1                         | 2.94                                 | 8.81                                  | [56, 60, 61]                                 |
| <i>Slc7a2</i>              | solute carrier family 7 (cationic amino acid transporter, y+ system), member 2      | 3.09                                 | 8.70                                  | [56]                                         |

|                |                                                          |      |      |                  |
|----------------|----------------------------------------------------------|------|------|------------------|
| <i>Socs3</i>   | suppressor of cytokine signaling 3                       | 2.37 | 4.77 | [56, 57, 62, 65] |
| <i>Tlr1</i>    | toll-like receptor 1; toll-like receptor 1 (Tlr1), mRNA. | 2.55 | 2.23 | [59]             |
| <i>Tnfaip3</i> | tumor necrosis factor, alpha-induced protein 3           | 5.12 | 8.46 | [59, 62]         |
| <i>Vcam1</i>   | vascular cell adhesion molecule 1                        | 4.71 | 7.69 | [56]             |
